# Supplementary material
Source: PubMed Central journal article supplement (PMC3831478)
Supplement: 1310760110_pnas.201310760SI.pdf [file 1310760110_pnas.201310760SI.pdf]

# Supporting Information

Naghavi et al. 10.1073/pnas.1310760110

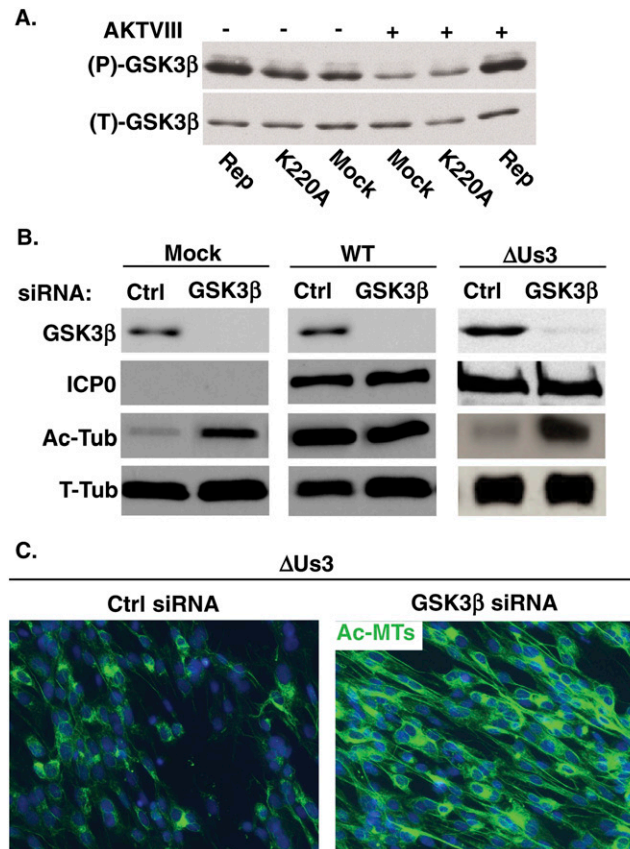

**Fig. S1.** Us3 inactivates glycogen synthase kinase 3beta (GSK3 $\beta$ ) to induce microtubule (MT) stabilization. (A) Normal human dermal fibroblasts (NHDFs) were mock-infected or infected at multiplicity of infection (m.o.i.) 10 with the indicated viruses in the presence of DMSO (–) or AKTVIII (+). Whole-cell extracts were analyzed by WB with the indicated antibodies. (P)-GSK3 $\beta$ , Ser9 phosphorylated GSK3 $\beta$ ; (T)-GSK3 $\beta$ , total GSK3 $\beta$ . (B) NHDFs were treated with Ctrl or GSK3 $\beta$  siRNAs and then mock-infected or infected with herpes simplex virus type 1 (HSV-1) wild-type (WT) or HSV-1  $\Delta$ Us3 at m.o.i. 10 for 16 h. Western blot analysis of whole-cell lysates, using the indicated antibodies, demonstrates an increase in Ac-tubulin accumulation on GSK3 $\beta$  depletion in mock-infected or  $\Delta$ Us3-infected cells but not in cells infected with WT HSV-1. Ac-Tub, acetylated tubulin; T-Tub, total tubulin. (C) NHDFs were treated with Ctrl or GSK3 $\beta$  siRNAs and then infected with HSV-1  $\Delta$ Us3 at m.o.i. 10 for 16 h. Fixed samples were probed with anti-Ac-Tubulin (green), illustrating the enhanced formation of stable MTs in GSK3 $\beta$ -depleted cultures. Nuclei were stained using Hoechst 33342.

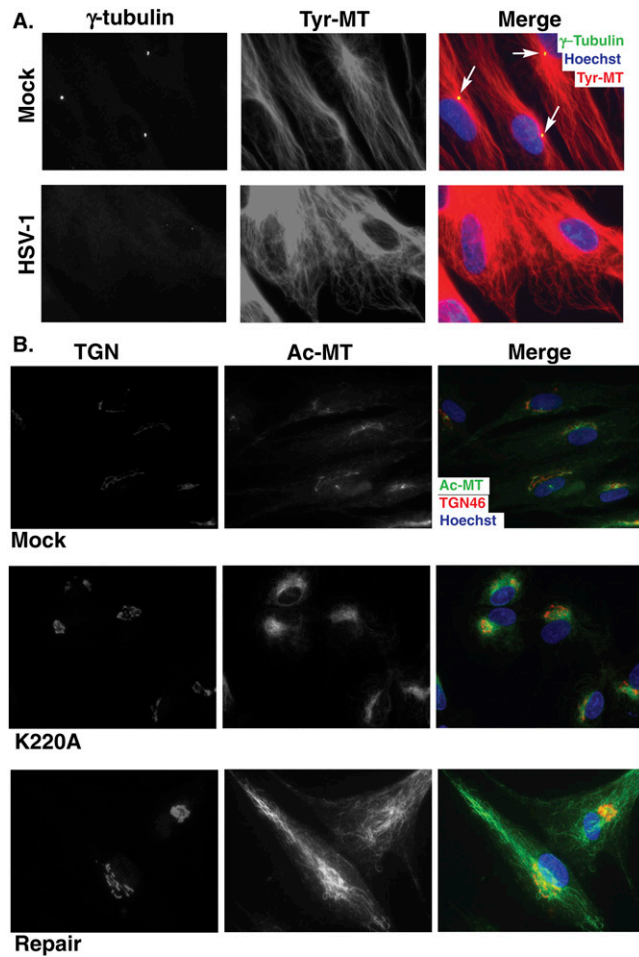

**Fig. S2.** HSV-1 infection disrupts the centrosome. NHDFs were mock-infected or infected with the indicated viruses at m.o.i. 10 for 9 h. (A) Fixed samples were stained for Tyr-MTs (red) and  $\gamma$ -tubulin (green). Arrows point to centrosomes. (B) Fixed samples were stained for the trans-Golgi network marker TGN46 (red) and Ac-MTs (green). Ac-MTs cluster proximal to the TGN in cells infected with Us3 mutant virus.

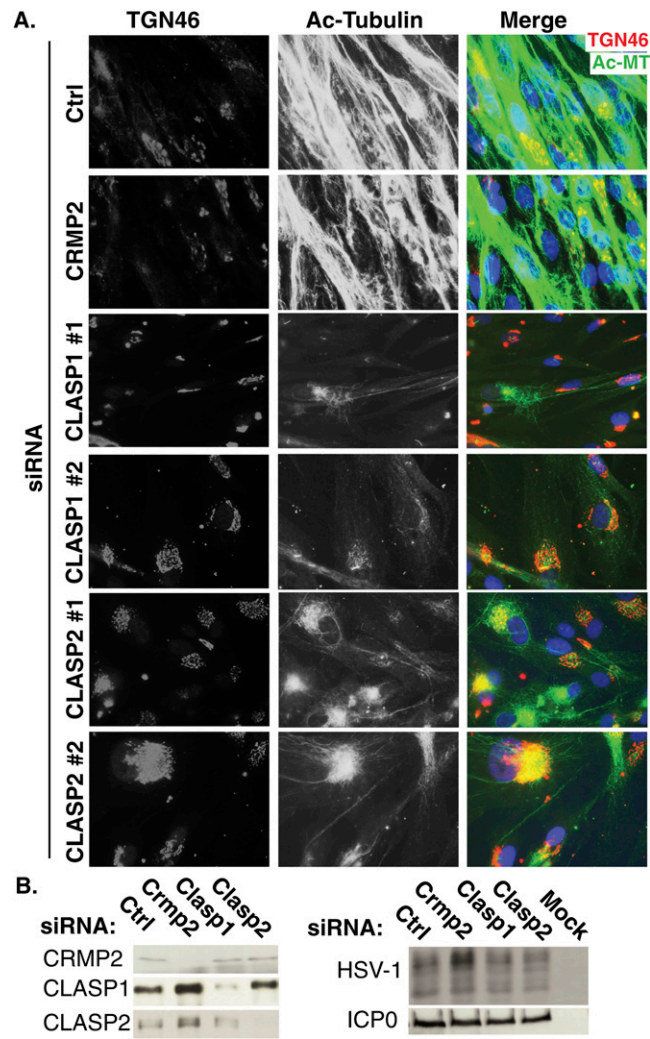

**Fig. 53.** Cytoplasmic linker-associated protein 1 (CLASP1) and CLASP2 are required for stable MT formation in HSV-1-infected cells. NHDFs were treated with Ctrl, collapsin response-mediating protein 2 (CRMP2), CLASP1, or CLASP2 siRNAs and then infected at m.o.i. 10 for 16 h. #1 and #2 indicate independent-targeting siRNAs. (A) Fixed samples were stained for TGN46 (red) and Ac-tubulin (green). Acquisition settings to image CLASP-depleted samples frequently results in overexposed images for Ctrl and CRMP2 samples as a result of high levels of Ac-MT staining. (B) WB analysis of whole-cell extracts demonstrates depletion of CLASP1, CLASP2, and CRMP2 in infected samples and levels of infected cell protein ICP0 (early) and HSV-1 virion (late structural) proteins in each sample.
